# Supplementary material for: Perception and clinical practice regarding mucus clearance devices with chronic obstructive pulmonary disease: a cross-sectional study of healthcare providers in Saudi Arabia
Source: PubMed Central journal article supplement — BMJ Open. 2023 Sep 14;13(9):e074849. doi: 10.1136/bmjopen-2023-074849 (PMC10503362; doi:10.1136/bmjopen-2023-074849), 2023-09-14
Supplement: bmjopen-2023-074849supp002.pdf [file bmjopen-2023-074849supp002.pdf]

*Supplemental Table 1: Providing MCDs in clinics*

| <b>Item</b>                                                  | <b>Frequency (%)</b> |
|--------------------------------------------------------------|----------------------|
| I advise patients to buy their own                           | 116 (9.8%)           |
| I don't provide them                                         | 314 (26.4%)          |
| I have them available to give to patients                    | 378 (31.8%)          |
| Prescription                                                 | 380 (32.0%)          |
| AARC guidelines for COPD                                     | 15.70%               |
| Domestic clinical practice guidelines at the center/hospital | 16.10%               |
| GOLD guidelines for COPD                                     | 20.10%               |
| NICE guidelines for COPD                                     | 15.00%               |
| STS guidelines for diagnosis and management of COPD          | 16.65%               |
